# Supplementary material for: A Longitudinal Study on Cognitive Training for Cognitively Preserved Adults in Liguria, Italy
Source: MDPI journal article supplement (doi:10.3390/healthcare12030393), 2024-02-02
Supplement: s1 [file s1]

Table S1. Assumption test Results of Regression Model on time T0

|              | Linearity test (F test)                                                                                                       | Normality (Shapiro Wilk test) | Heteroscedasticity test (scatter plot test)             | Autocorrelation test (Durbin-Watson test) | Multicollinearity test (Variance inflation factors test)                                                                                       | Description                                                                                                                                                                              |
|--------------|-------------------------------------------------------------------------------------------------------------------------------|-------------------------------|---------------------------------------------------------|-------------------------------------------|------------------------------------------------------------------------------------------------------------------------------------------------|------------------------------------------------------------------------------------------------------------------------------------------------------------------------------------------|
| <b>MACQ</b>  | F test values in the active/passive group, gender, age, and education were <0.0001, <0.0001, 0.7415, and 0.7567 respectively  | <0.0001                       | The points did not form a particular pattern and spread | 0.8953                                    | VIF values of diversification in the active/passive group, gender, age, and education were 1.0004, 1.0012, 1.3819, and 1.3831 respectively <10 | Passed linearity test for group, and gender variables; data were not normally distributed; heteroscedasticity did not occur; No autocorrelation; multicollinearity did not occur         |
| <b>GDS-4</b> | F test values in the active/passive group, gender, age, and education were <0.0001, 0.2483, 0.0152, and <0.0001 respectively  | <0.0001                       | The points did not form a particular pattern and spread | 1.9384                                    | VIF values of diversification in the active/passive group, gender, age, and education were 1.0004, 1.0012, 1.3819, 1.3831 respectively <10     | Passed linearity test for group, age, and education variables; data were not normally distributed; heteroscedasticity did not occur; No autocorrelation; multicollinearity did not occur |
| <b>A3LP</b>  | F test values in the active/passive group, gender, age, and education were <0.0001, 0.9349, <0.0001, and <0.0001 respectively | 0.0003                        | The points did not form a particular pattern and spread | 1.490                                     | VIF values of diversification in the active/passive group, gender, age, and education were 1.0004, 1.0012, 1.3819, 1.3831 respectively <10     | Passed linearity test for group, age, and education variables; data were not normally distributed; heteroscedasticity did not occur; No autocorrelation; multicollinearity did not occur |
| <b>VF</b>    | F test values in the active/passive group, gender, age, and education were 0.0477, 0.3647, <0.0001, and <0.0001 respectively  | 0.0006                        | The points did not form a particular pattern and spread | 1.8452                                    | VIF values of diversification in the active/passive group, gender, age, and education were 1.0004, 1.0012, 1.3819, 1.3831 respectively <10     | Passed linearity test for group, age, and education variables; data were not normally distributed; heteroscedasticity did not occur; No autocorrelation; multicollinearity did not occur |

Table S2. Assumption test Results of Regression Model on time T1

|              | Linearity test (F test)                                                                                                       | Normality (Shapiro Wilk test) | Heteroscedasticity test (scatter plot test)             | Autocorrelation test (Durbin-Watson test) | Multicollinearity test (Variance inflation factors test)                                                                                       | Description                                                                                                                                                                              |
|--------------|-------------------------------------------------------------------------------------------------------------------------------|-------------------------------|---------------------------------------------------------|-------------------------------------------|------------------------------------------------------------------------------------------------------------------------------------------------|------------------------------------------------------------------------------------------------------------------------------------------------------------------------------------------|
| <b>MACQ</b>  | F test values in the active/passive group, gender, age, and education were <0.0001, 0.1719, 0.2184, and 0.3185 respectively   | 0.0221                        | The points did not form a particular pattern and spread | 1.4564                                    | VIF values of diversification in the active/passive group, gender, age, and education were 1.0004, 1.0012, 1.3819, and 1.3831 respectively <10 | Passed linearity test for group variable; data were not normally distributed; heteroscedasticity did not occur; No autocorrelation; multicollinearity did not occur                      |
| <b>GDS-4</b> | F test values in the active/passive group, gender, age, and education were <0.0001, 0.1520, 0.0220, and 0.0037 respectively   | <0.0001                       | The points did not form a particular pattern and spread | 2.0216                                    | VIF values of diversification in the active/passive group, gender, age, and education were 1.0004, 1.0012, 1.3819, 1.3831 respectively <10     | Passed linearity test for group, age, and education variables; data were not normally distributed; heteroscedasticity did not occur; No autocorrelation; multicollinearity did not occur |
| <b>A3LP</b>  | F test values in the active/passive group, gender, age, and education were <0.0001, 0.3353, <0.0001, and <0.0001 respectively | <0.0001                       | The points did not form a particular pattern and spread | 1.2945                                    | VIF values of diversification in the active/passive group, gender, age, and education were 1.0004, 1.0012, 1.3819, 1.3831 respectively <10     | Passed linearity test for group, age, and education variables; data were not normally distributed; heteroscedasticity did not occur; No autocorrelation; multicollinearity did not occur |
| <b>VF</b>    | F test values in the active/passive group, gender, age, and education were <0.0001, 0.3904, <0.0001, and <0.0001 respectively | <0.0001                       | The points did not form a particular pattern and spread | 1.8515                                    | VIF values of diversification in the active/passive group, gender, age, and education were 1.0004, 1.0012, 1.3819, 1.3831 respectively <10     | Passed linearity test for group, age, and education variables; data were not normally distributed; heteroscedasticity did not occur; No autocorrelation; multicollinearity did not occur |

Table S3. Assumption test Results of Regression Model on time T2

|              | <b>Linearity test<br/>(F test)</b>                                                                                            | <b>Normality<br/>(Shapiro Wilk<br/>test)</b> | <b>Heteroscedasticity test<br/>(scatter plot test)</b>  | <b>Autocorrelation<br/>test<br/>(Durbin-<br/>Watson test)</b> | <b>Multicollinearity test<br/>(Variance inflation factors test)</b>                                                                            | <b>Description</b>                                                                                                                                                                       |
|--------------|-------------------------------------------------------------------------------------------------------------------------------|----------------------------------------------|---------------------------------------------------------|---------------------------------------------------------------|------------------------------------------------------------------------------------------------------------------------------------------------|------------------------------------------------------------------------------------------------------------------------------------------------------------------------------------------|
| <b>MACQ</b>  | F test values in the active/passive group, gender, age, and education were <0.0001, <0.0511, 0.5030, and 0.3753 respectively  | <0.0001                                      | The points did not form a particular pattern and spread | 1.4496                                                        | VIF values of diversification in the active/passive group, gender, age, and education were 1.0004, 1.0012, 1.3819, and 1.3831 respectively <10 | Passed linearity test for group and gender variables; data were not normally distributed; heteroscedasticity did not occur; No autocorrelation; multicollinearity did not occur          |
| <b>GDS-4</b> | F test values in the active/passive group, gender, age, and education were <0.0001, 0.4298, 0.0793, and 0.0117 respectively   | <0.0001                                      | The points did not form a particular pattern and spread | 1.1958                                                        | VIF values of diversification in the active/passive group, gender, age, and education were 1.0004, 1.0012, 1.3819, 1.3831 respectively <10     | Passed linearity test for group and education variables; data were not normally distributed; heteroscedasticity did not occur; No autocorrelation; multicollinearity did not occur       |
| <b>A3LP</b>  | F test values in the active/passive group, gender, age, and education were <0.0001, 0.5759, 0.0002, and <0.0001 respectively  | <0.0001                                      | The points did not form a particular pattern and spread | 1.2261                                                        | VIF values of diversification in the active/passive group, gender, age, and education were 1.0004, 1.0012, 1.3819, 1.3831 respectively <10     | Passed linearity test for group, and education variables; data were not normally distributed; heteroscedasticity did not occur; No autocorrelation; multicollinearity did not occur      |
| <b>VF</b>    | F test values in the active/passive group, gender, age, and education were <0.0001, 0.6830, <0.0001, and <0.0001 respectively | <0.0001                                      | The points did not form a particular pattern and spread | 1.8437                                                        | VIF values of diversification in the active/passive group, gender, age, and education were 1.0004, 1.0012, 1.3819, 1.3831 respectively <10     | Passed linearity test for group, age, and education variables; data were not normally distributed; heteroscedasticity did not occur; No autocorrelation; multicollinearity did not occur |

Table S4. Assumption test Results of Regression Model on time T3

|              | <b>Linearity test<br/>(F test)</b>                                                                                           | <b>Normality<br/>(Shapiro<br/>Wilk test)</b> | <b>Heteroscedasticity<br/>test<br/>(scatter plot test)</b> | <b>Autocorrelation<br/>test<br/>(Durbin-<br/>Watson test)</b> | <b>Multicollinearity test<br/>(Variance inflation factors<br/>test)</b>                                                                        | <b>Description</b>                                                                                                                                                                       |
|--------------|------------------------------------------------------------------------------------------------------------------------------|----------------------------------------------|------------------------------------------------------------|---------------------------------------------------------------|------------------------------------------------------------------------------------------------------------------------------------------------|------------------------------------------------------------------------------------------------------------------------------------------------------------------------------------------|
| <b>MACQ</b>  | F test values in the active/passive group, gender, age, and education were <0.0001, 0.0058, 0.6089, and 0.6741 respectively  | <0.0001                                      | The points did not form a particular pattern and spread    | 1.5167                                                        | VIF values of diversification in the active/passive group, gender, age, and education were 1.0005, 1.0013, 1.3825, and 1.3838 respectively <10 | Passed linearity test for group and gender variables; data were not normally distributed; heteroscedasticity did not occur; No autocorrelation; multicollinearity did not occur          |
| <b>GDS-4</b> | F test values in the active/passive group, gender, age, and education were 0.0175, 0.9276, 0.0324, and 0.0007 respectively   | <0.0001                                      | The points did not form a particular pattern and spread    | 1.3086                                                        | VIF values of diversification in the active/passive group, gender, age, and education were 1.0005, 1.0013, 1.3825, and 1.3838 respectively <10 | Passed linearity test for group and education variables; data were not normally distributed; heteroscedasticity did not occur; No autocorrelation; multicollinearity did not occur       |
| <b>A3LP</b>  | F test values in the active/passive group, gender, age, and education were <0.0001, 0.6560, 0.0040, and <0.0001 respectively | <0.0001                                      | The points did not form a particular pattern and spread    | 1.2327                                                        | VIF values of diversification in the active/passive group, gender, age, and education were 1.0005, 1.0013, 1.3825, and 1.3838 respectively <10 | Passed linearity test for group, age, and education variables; data were not normally distributed; heteroscedasticity did not occur; No autocorrelation; multicollinearity did not occur |
| <b>VF</b>    | F test values in the active/passive group, gender, age, and education were 0.1785, 0.9706, <0.0001, and <0.0001 respectively | <0.0001                                      | The points did not form a particular pattern and spread    | 1.7884                                                        | VIF values of diversification in the active/passive group, gender, age, and education were 1.0005, 1.0013, 1.3825, and 1.3838 respectively <10 | Passed linearity test for age, and education variables; data were not normally distributed; heteroscedasticity did not occur; No autocorrelation; multicollinearity did not occur        |
